# Supplementary material for: Two anhydrous forms and one monohydrate of a cocrystal of axitinib and glutaric acid: characterization, property evaluation and phase transition study
Source: Royal Society of Chemistry journal article supplement (doi:10.1039/d1ce01740c), 2022-01-01
Supplement: d1ce01740c1.pdf [file d1ce01740c1.pdf]

## Supplementary data for

### **Two anhydrous forms and one monohydrate of a cocrystal of axitinib and glutaric acid: characterization, property evaluation and phase transition study**

**Bo-Ying Ren<sup>a</sup>, Xia-Lin Dai<sup>b</sup>, Jia-Mei Chen<sup>\*b</sup>, Tong-Bu Lu<sup>a</sup>**

(a)

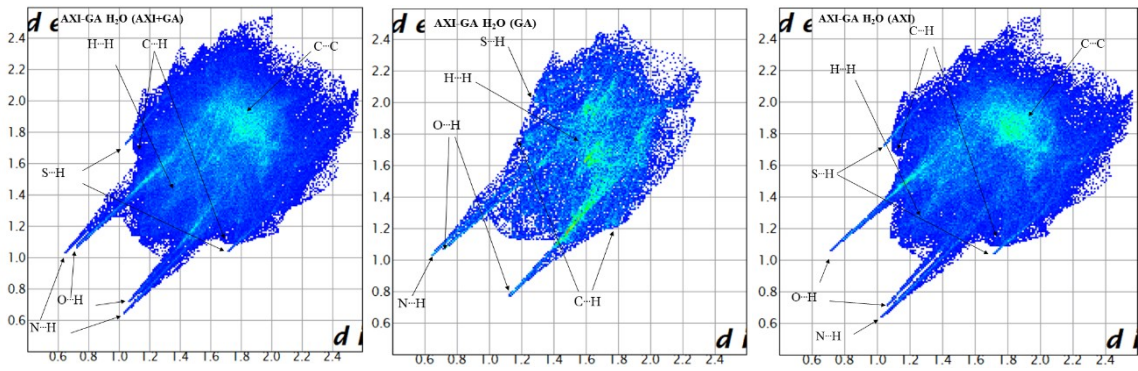

(b)

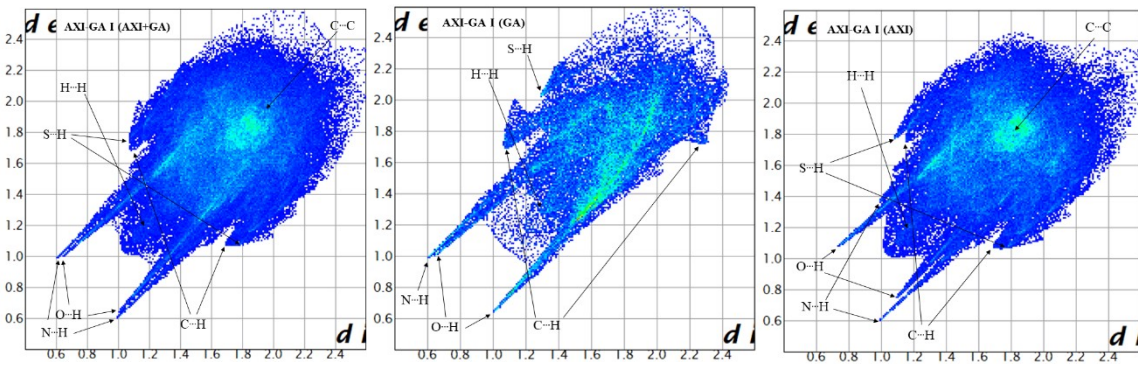

**Figure S1.** 2D fingerprint plots of the Hirshfeld surfaces of (a) AXI-GA·H<sub>2</sub>O (b) AXI-GA I.

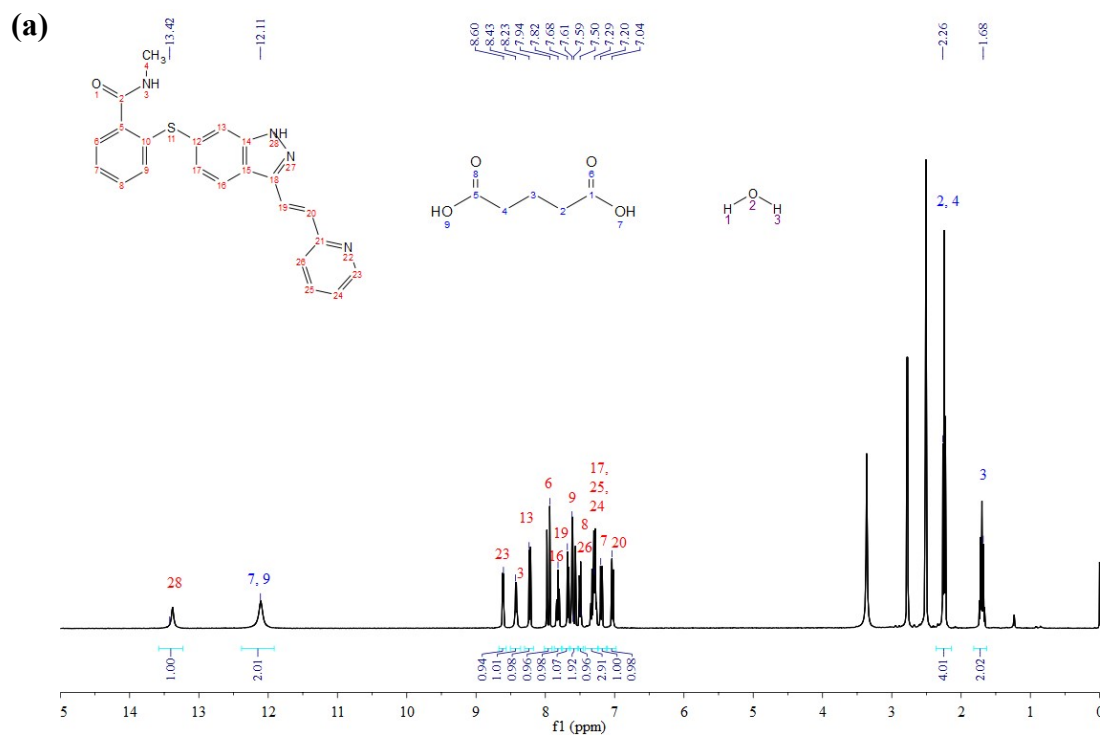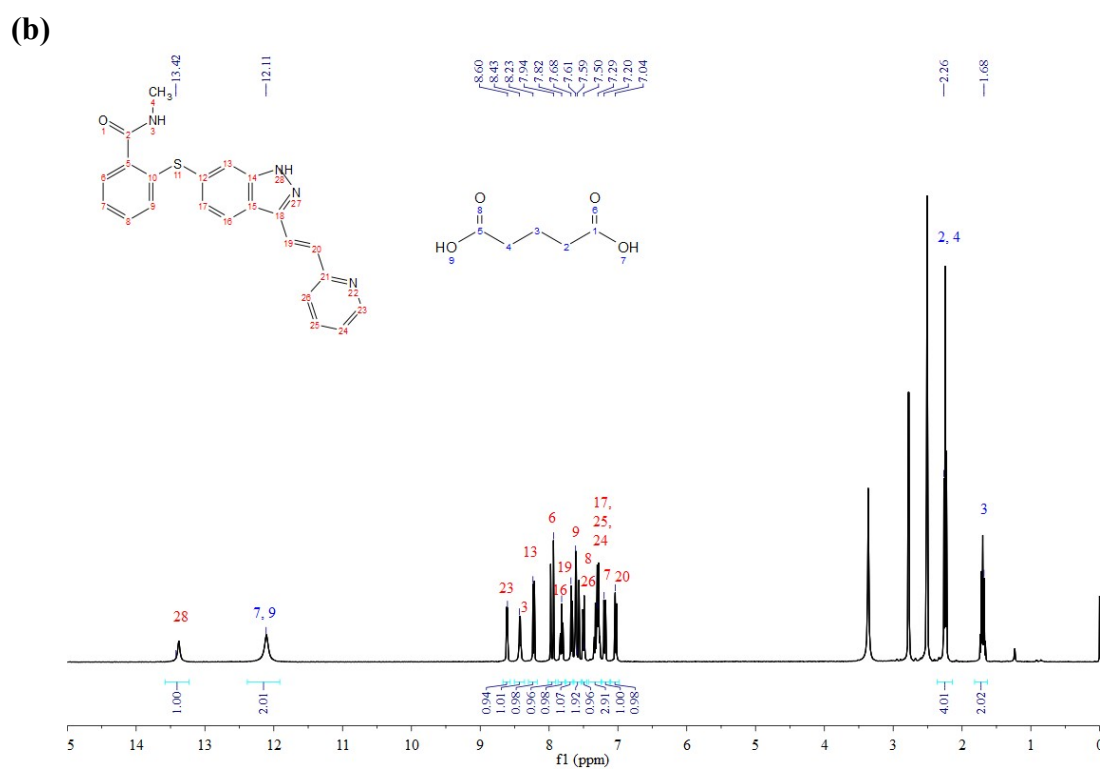

**Figure S2.**  $^1\text{H}$  NMR spectra of (a) **AXI-GA·H<sub>2</sub>O** and (b) **AXI-GA I**.

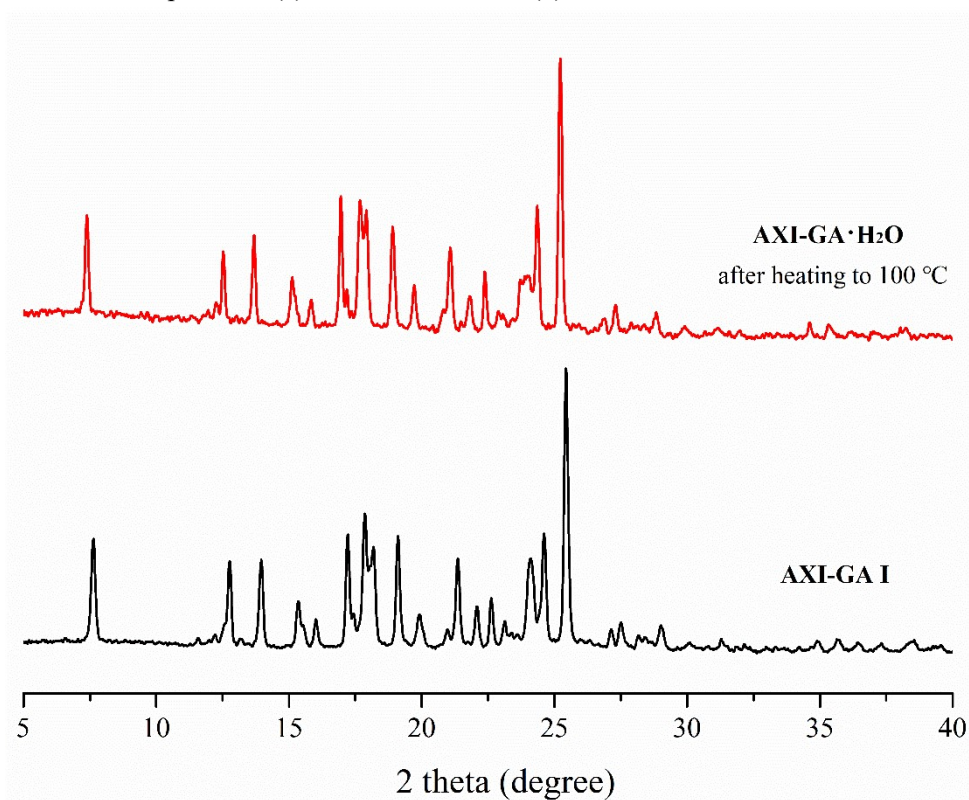

**Figure S3.** PXRD patterns of **AXI-GA·H<sub>2</sub>O** after heating to 100 °C.

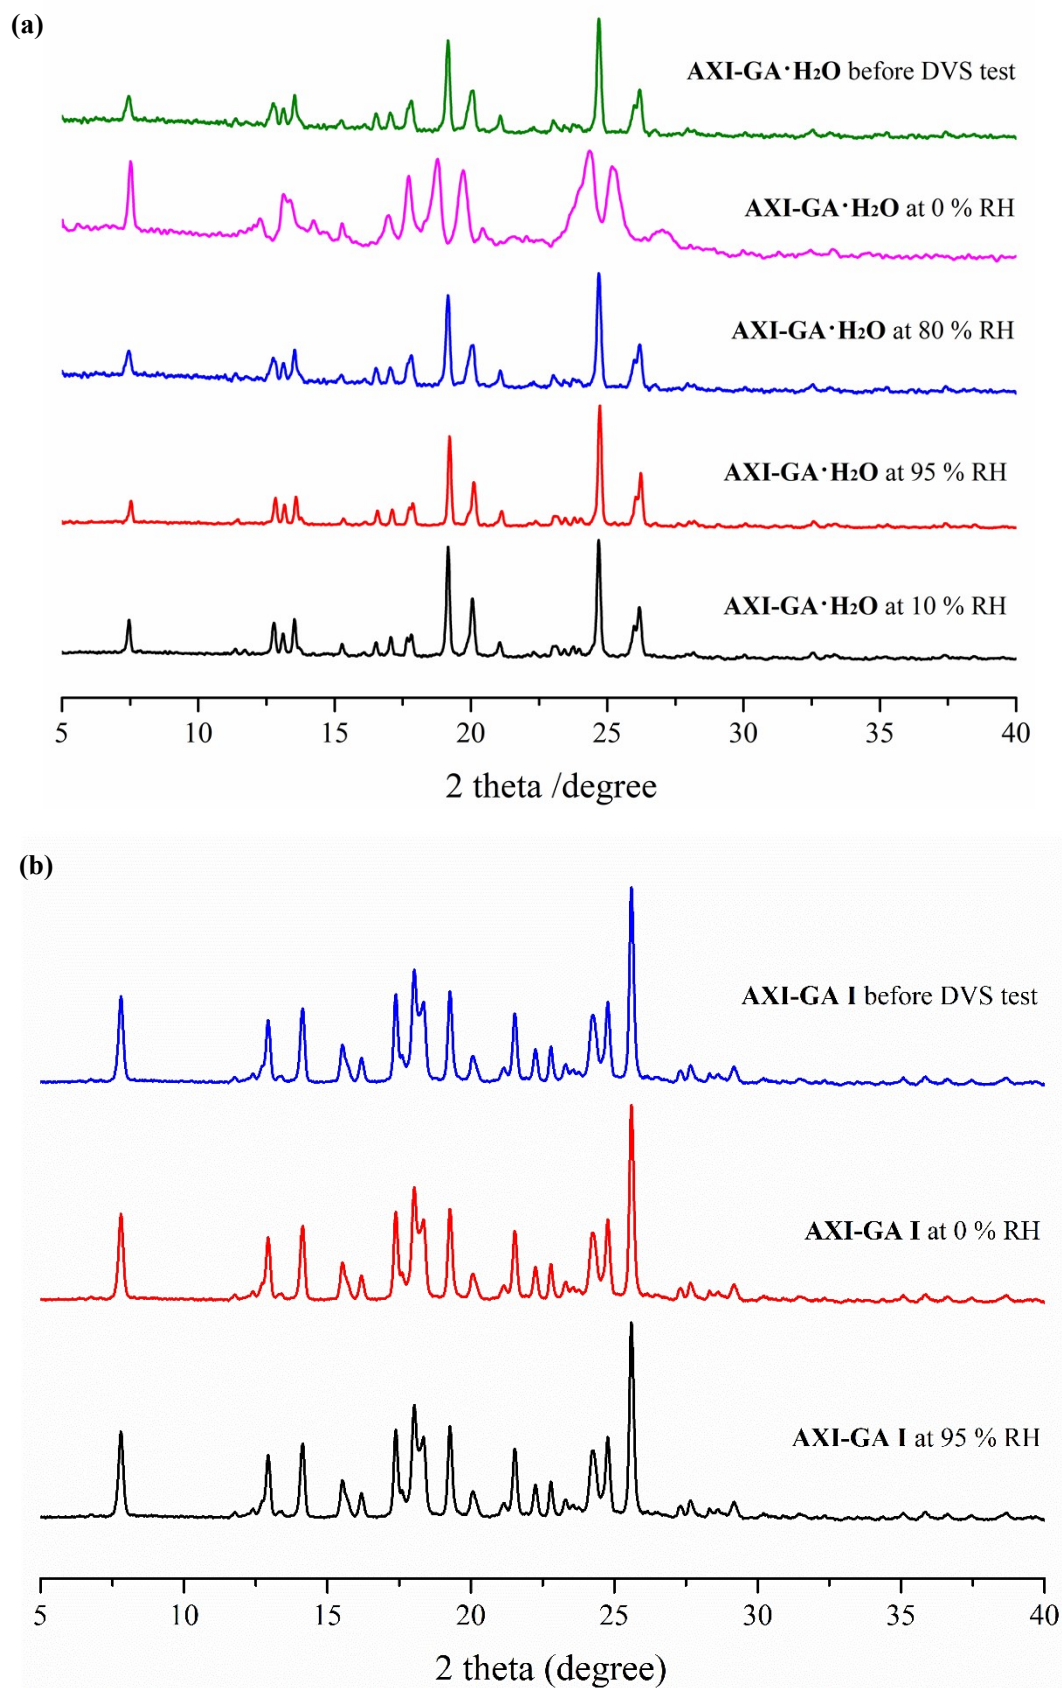

**Figure S4.** PXRD patterns of (a) AXI-GA·H<sub>2</sub>O and (b) AXI-GA I involving in DVS test. A phase change from AXI-GA·H<sub>2</sub>O to a metastable form (referring to AXI-GA II) was observed at 0% RH, which converted back to AXI-GA·H<sub>2</sub>O at 80% RH.

(a)

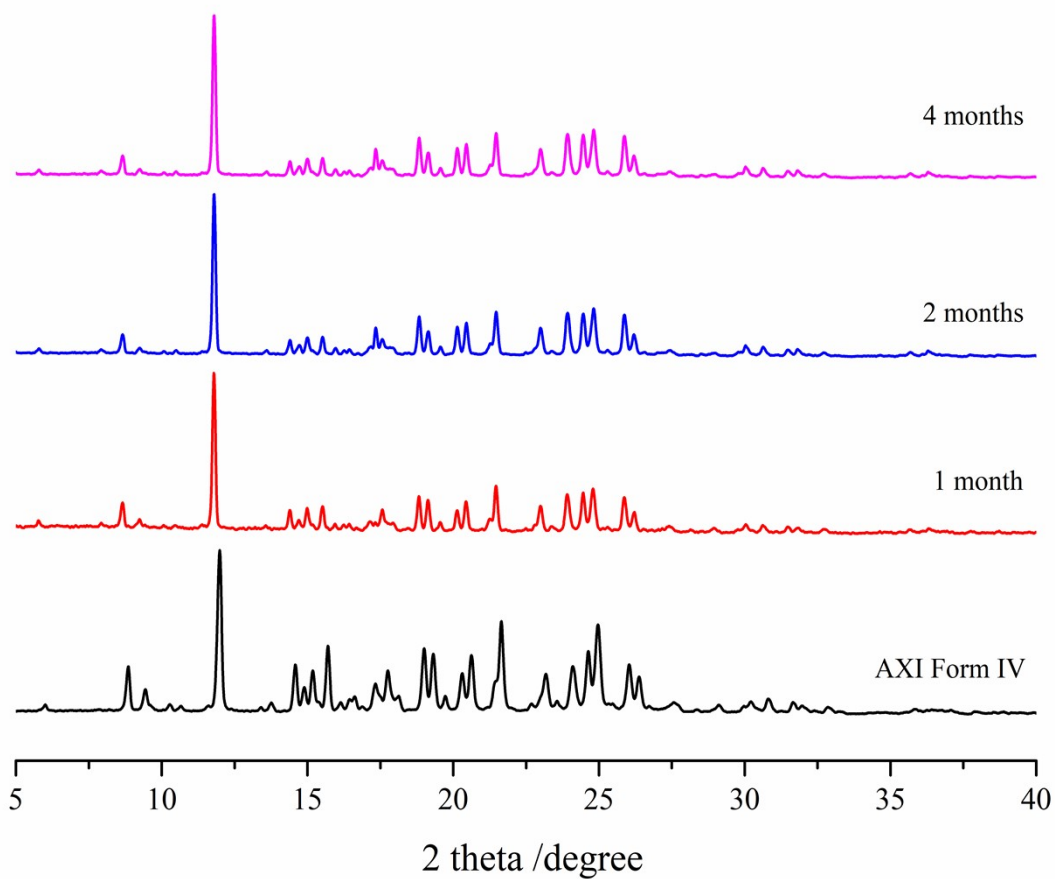

(b)

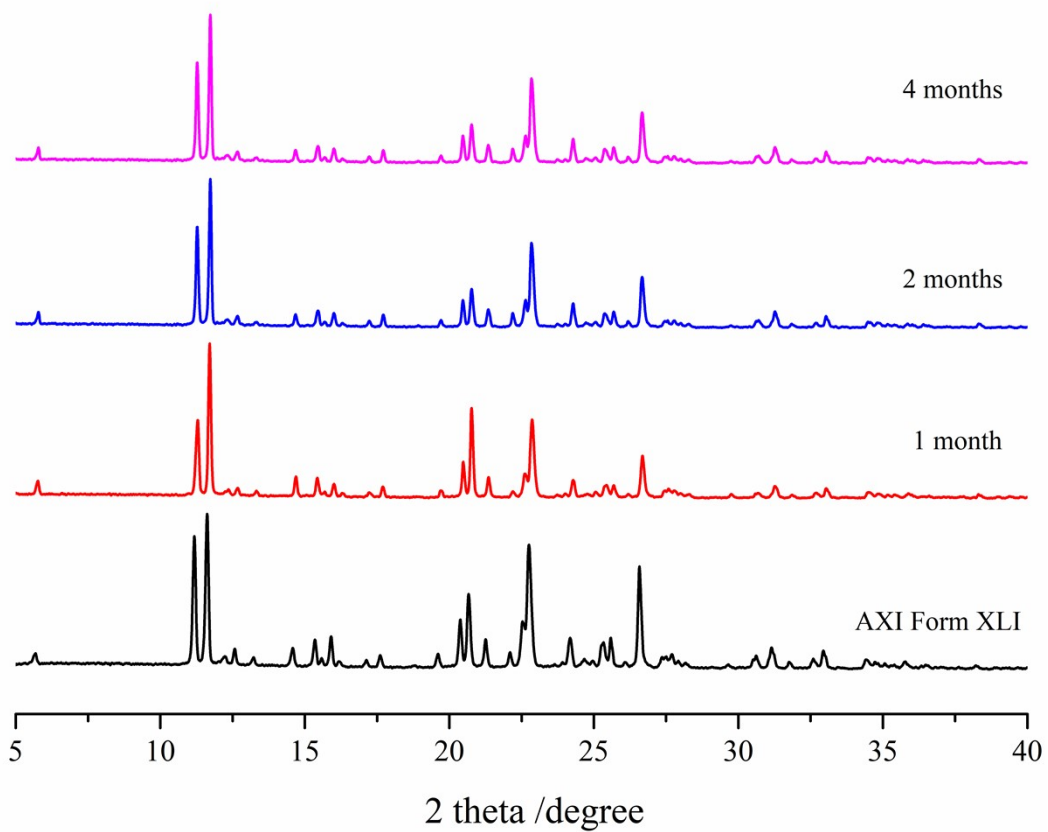

(c)

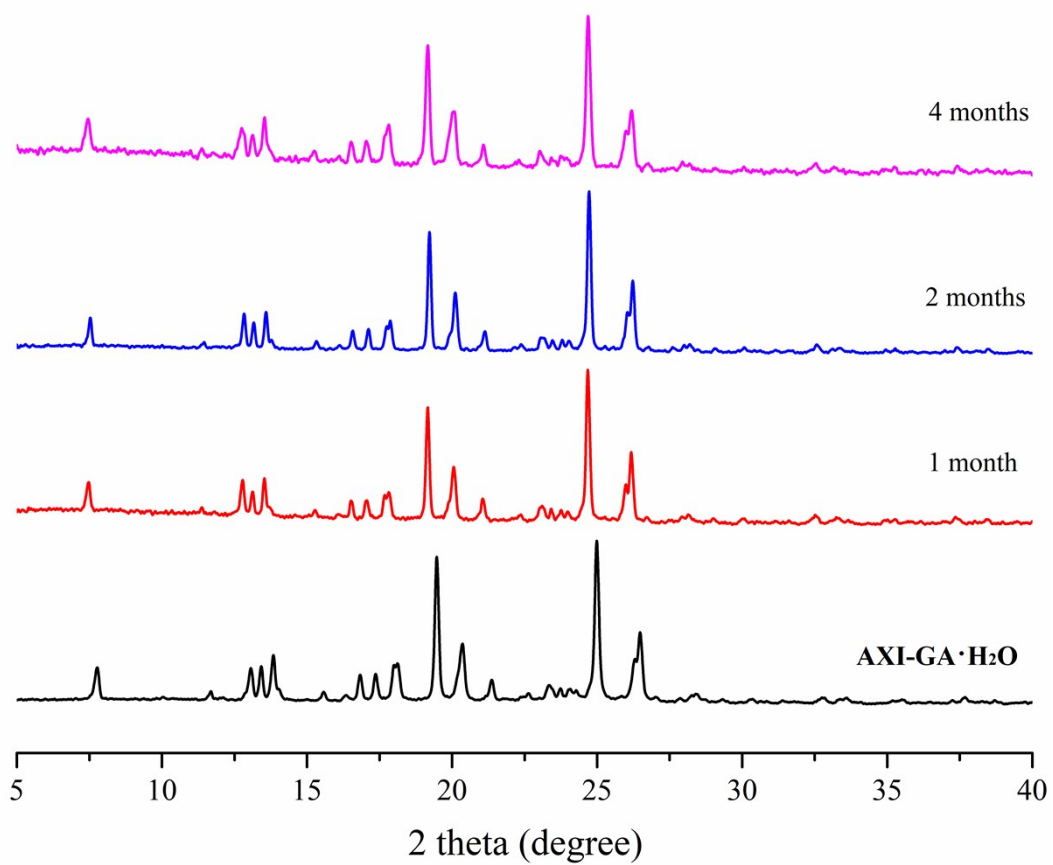

(d)

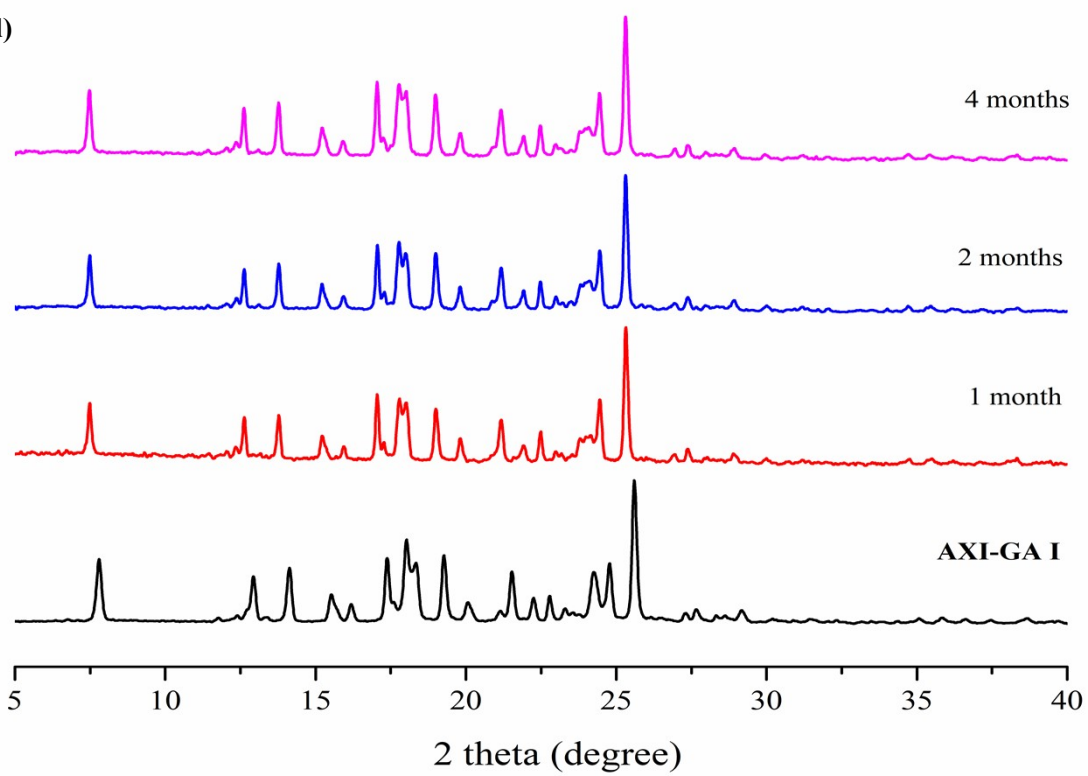

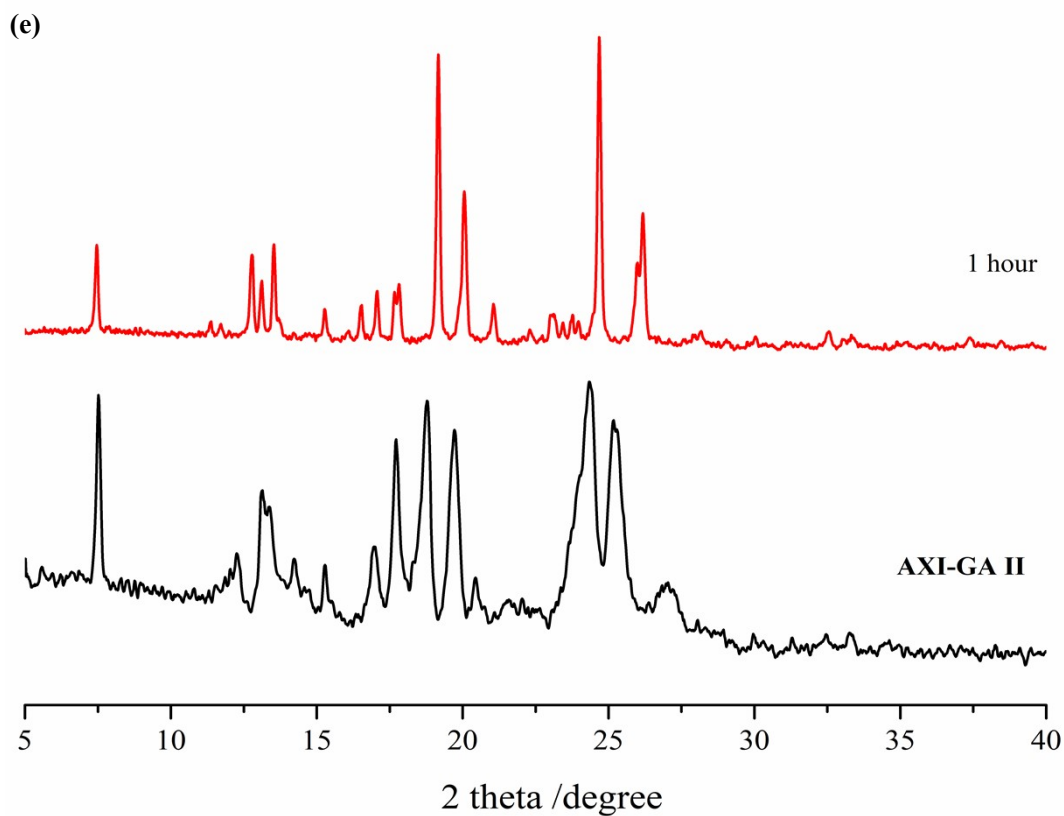

**Figure S5.** PXRD patterns of (a) AXI Form IV, (b) AXI Form XLI, (c) AXI-GA·H<sub>2</sub>O, (d) AXI-GA I and (e) AXI-GA II under 40 °C/75% RH accelerated conditions.

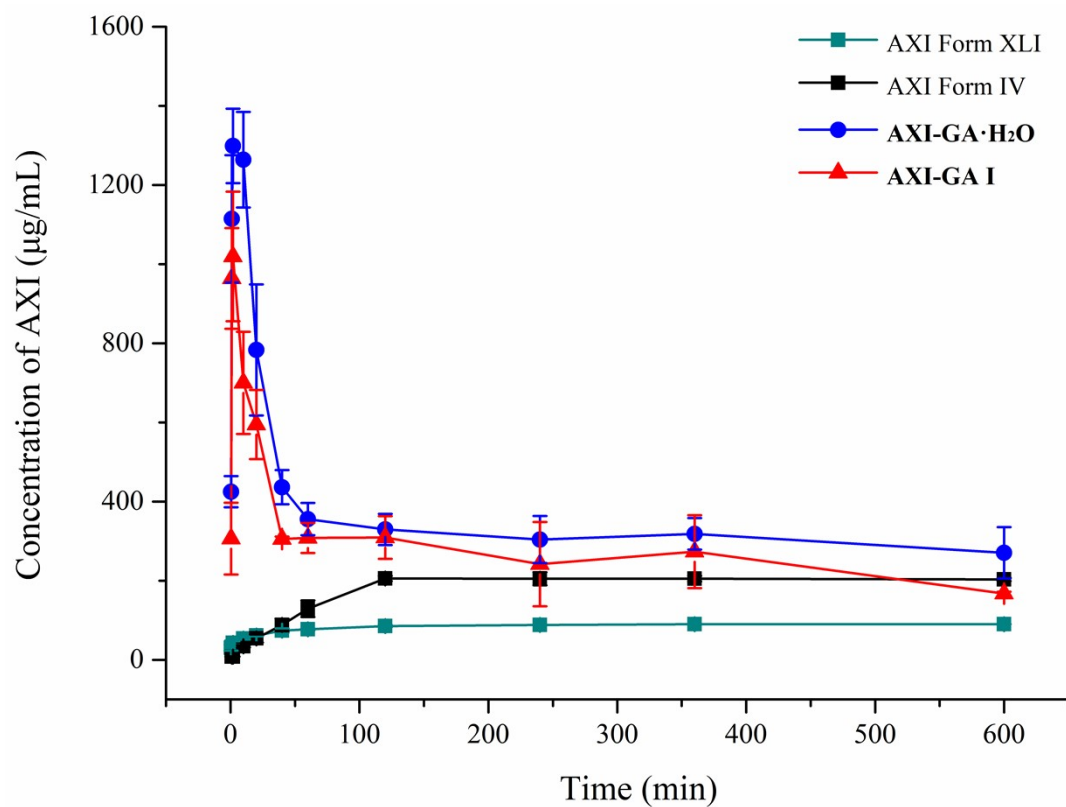

**Figure S6.** Powder dissolution profiles for AXI-GA·H<sub>2</sub>O, AXI-GA I and AXI within 10 h.



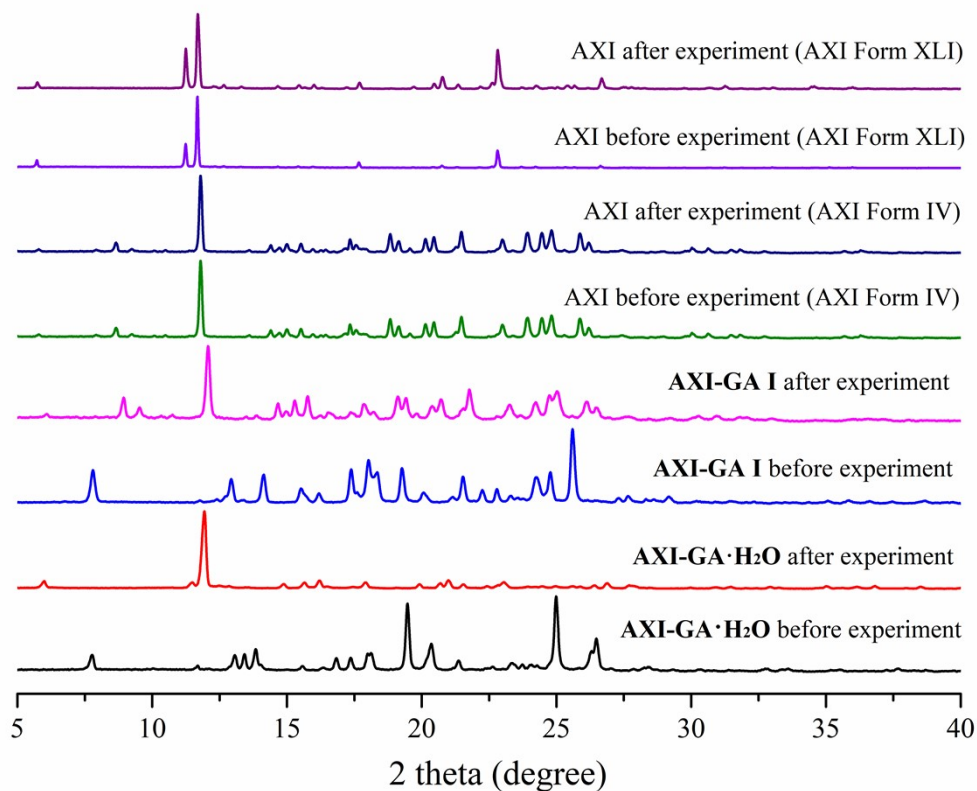

**Figure S7.** PXRD patterns of the residual solids of AXI-GA·H<sub>2</sub>O, AXI-GA I, AXI Form IV and XLI after powder dissolution experiments.

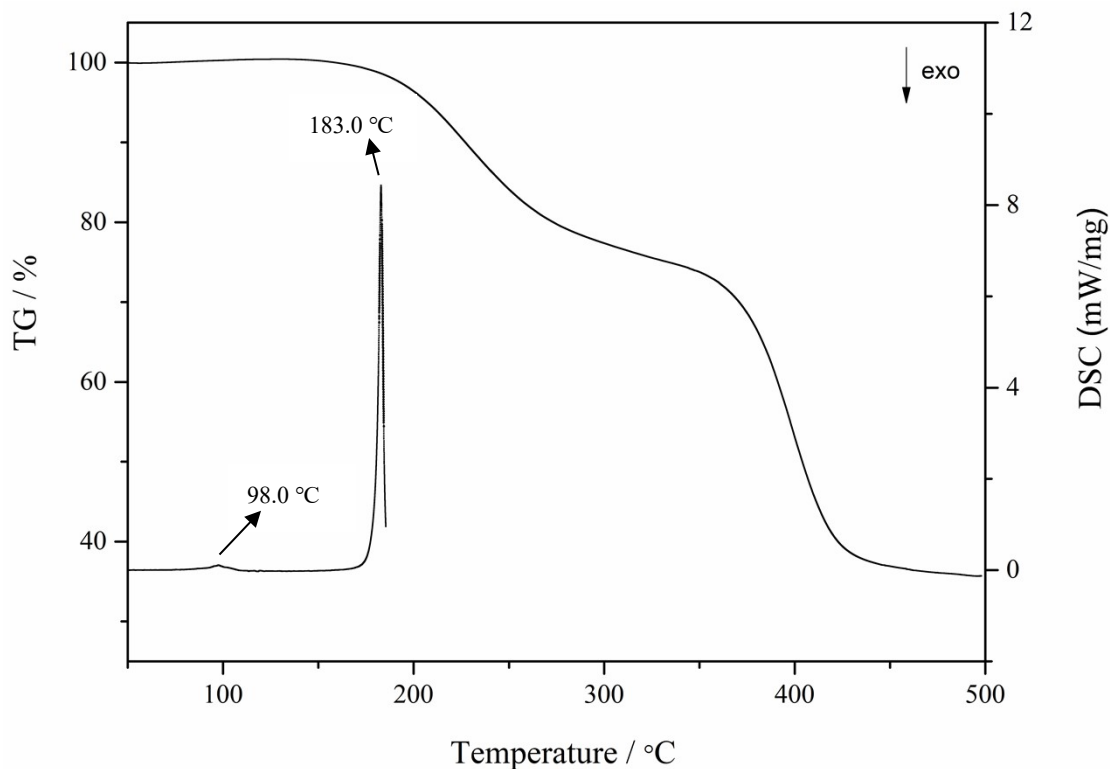

**Figure S8.** TG-DSC curves of AXI-GA II.

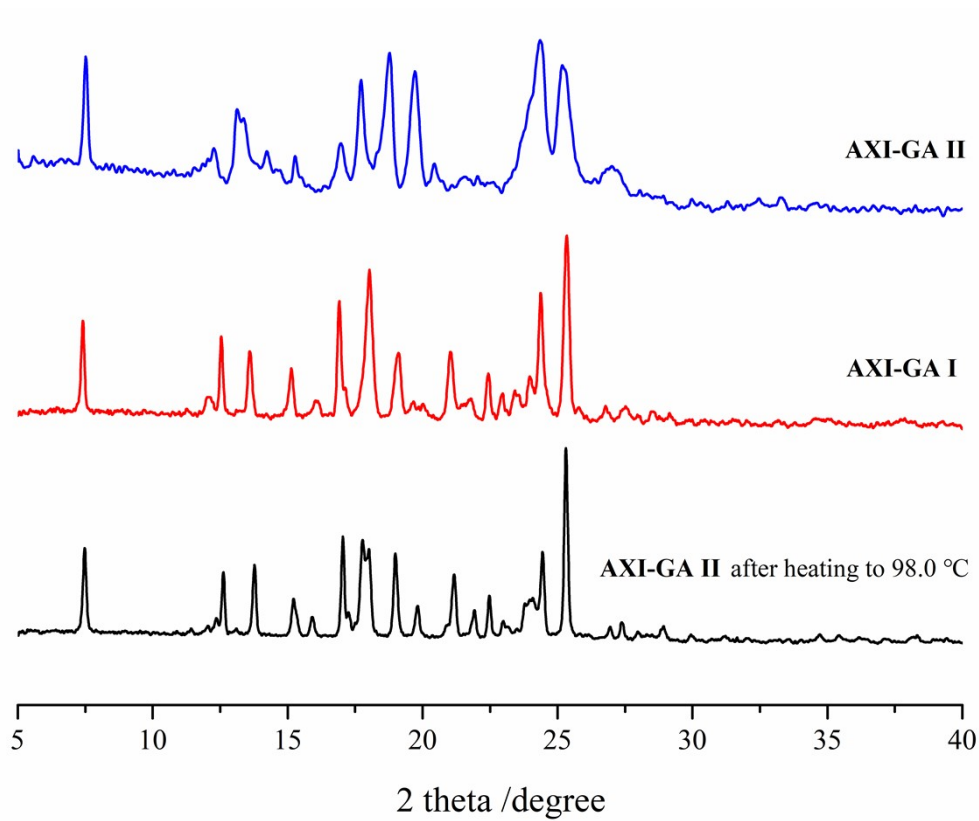

**Figure S9.** PXRD patterns of AXI-GA II and its powder sample heating after 98.0 °C.

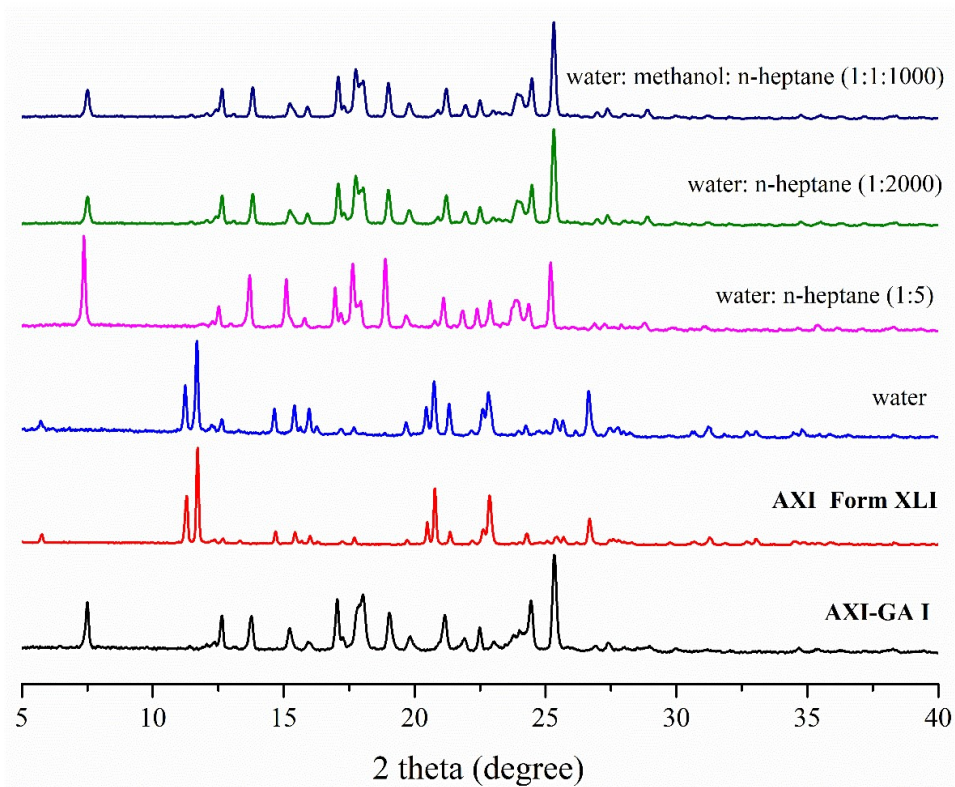

**Figure S10.** PXRD patterns of the residual solids of powdered 1:1 mixture of AXI-GA·H<sub>2</sub>O and AXI-GA I after slurry in various solvents.
